# Supplementary material
Source: Springer Nature journal article supplement (https://www.springermedizin.de/resource/supplementary/12874_2005_123_MOESM3_ESM.pdf/9433820)

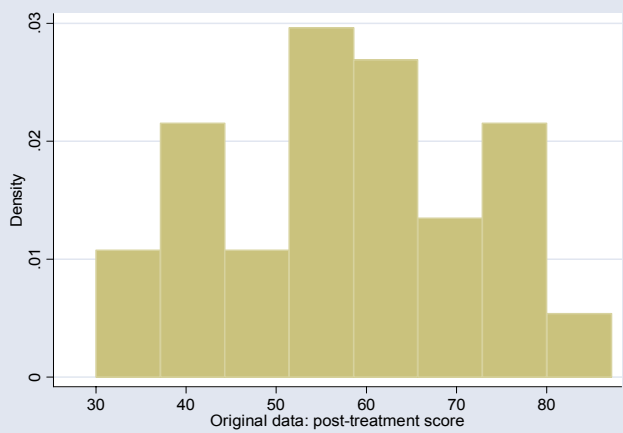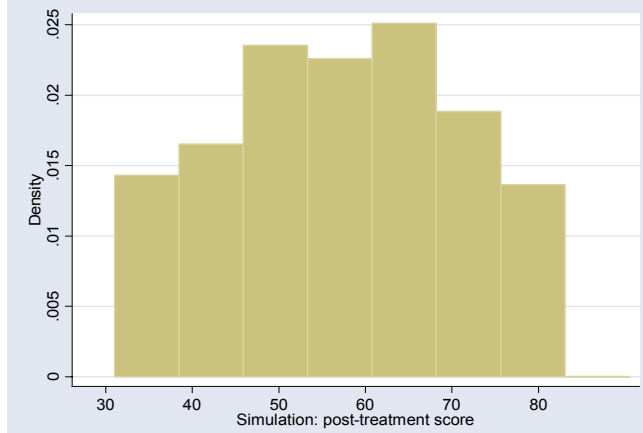

3a

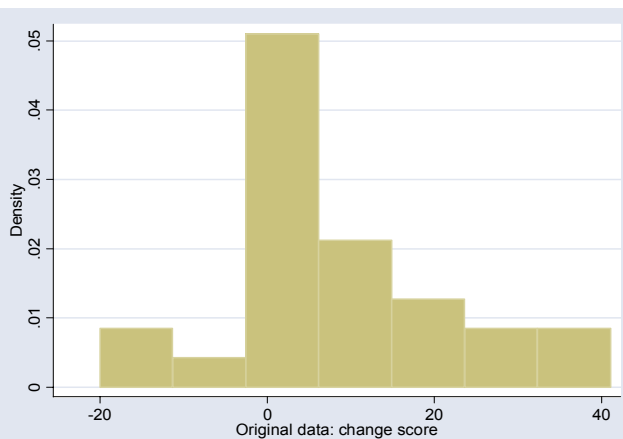

3c

3b

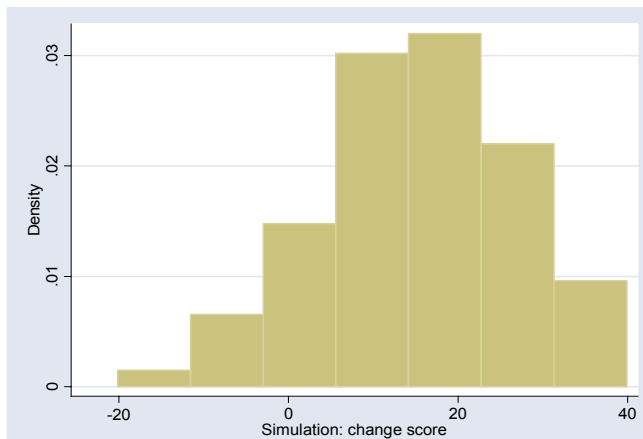

3d

Supplement: MOESM3 [file 9433820]
